# Supplementary material
Source: Springer Nature journal article supplement (https://www.springermedizin.de/resource/supplementary/12889_2011_3426_MOESM1_ESM.pdf/9489028)

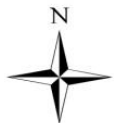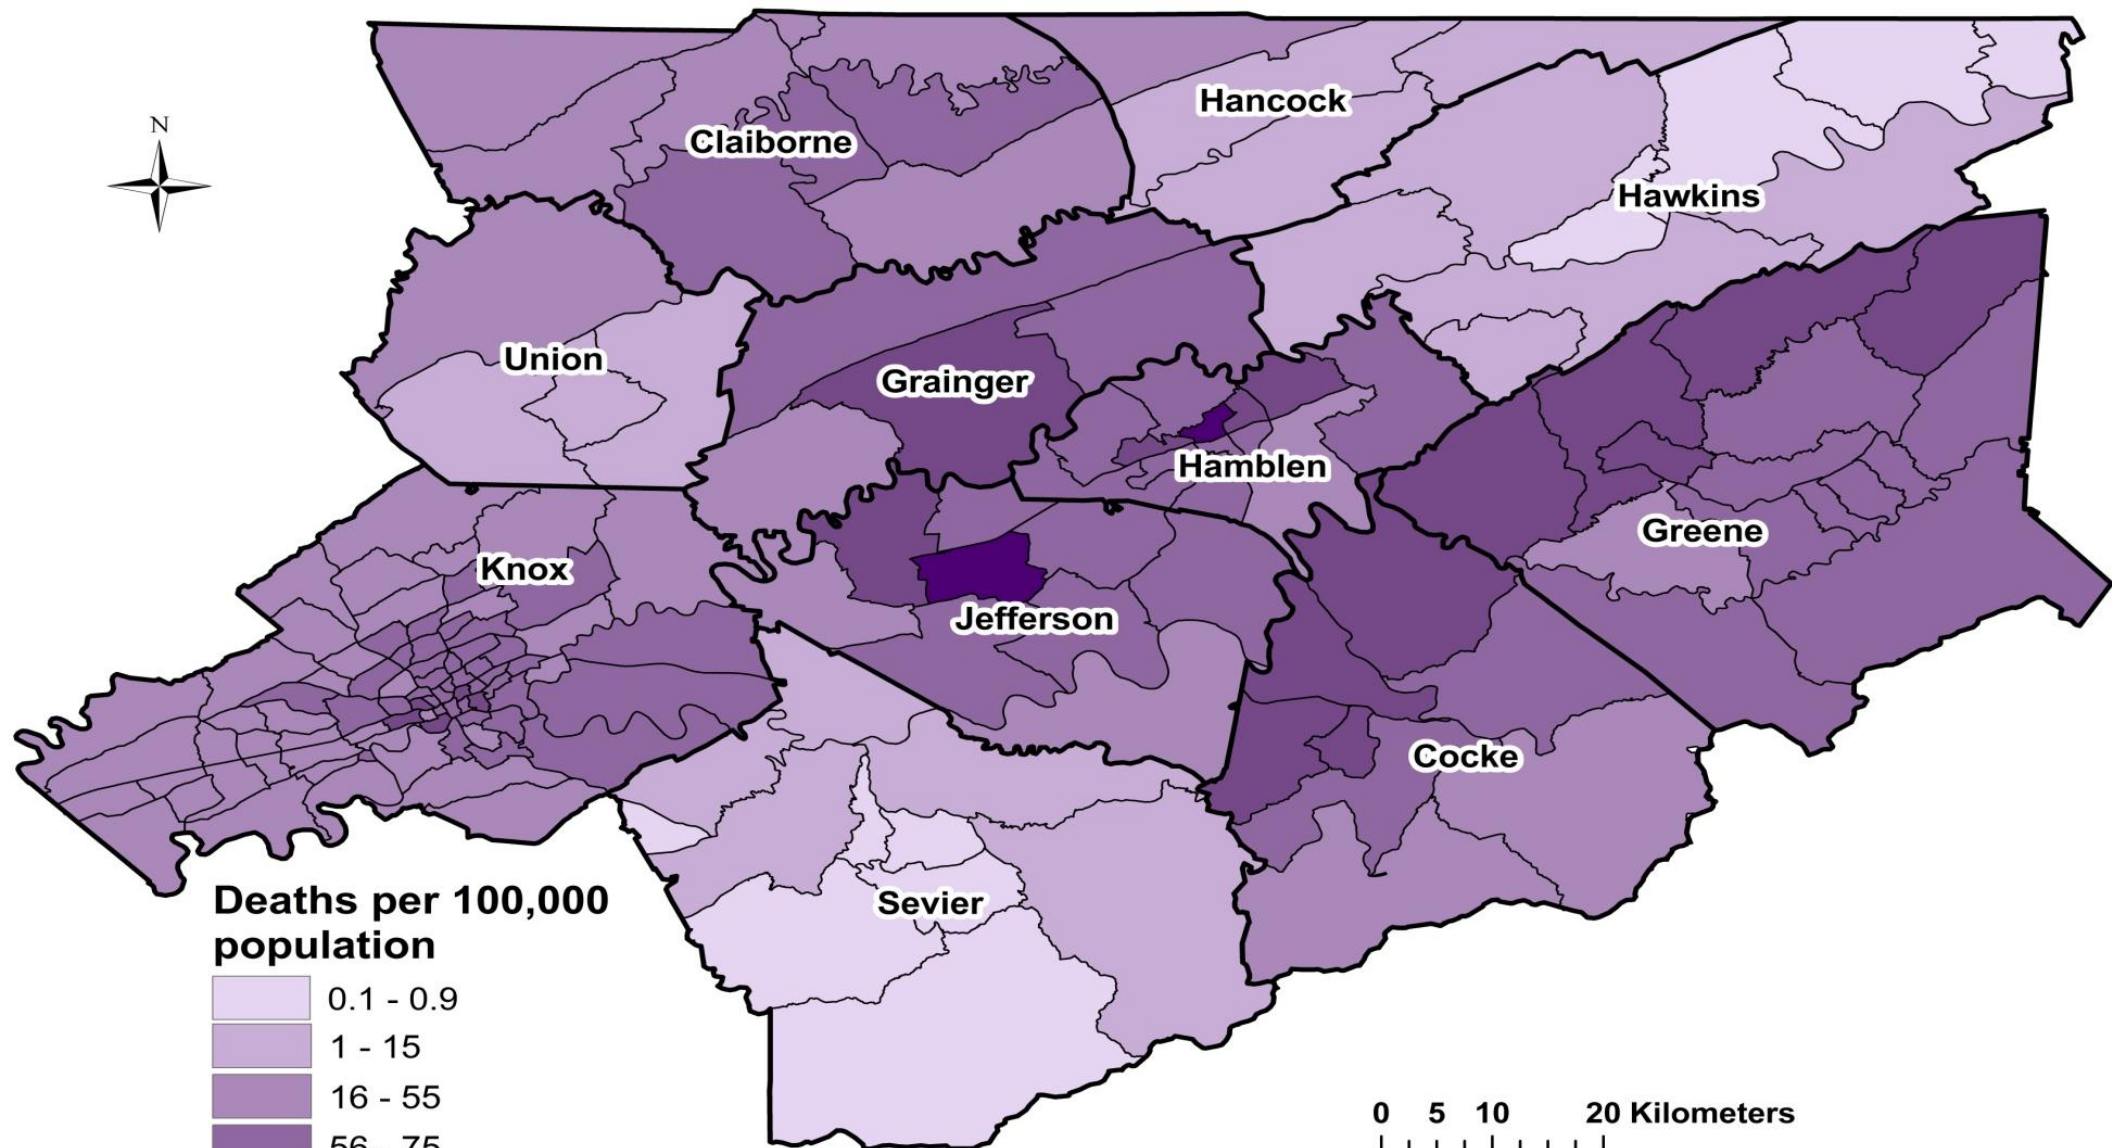

**Deaths per 100,000 population**

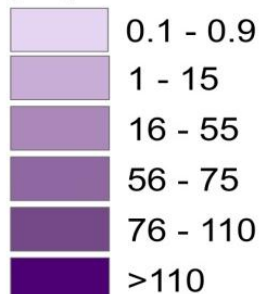

-  Census Tract Boundaries
-  County Boundaries

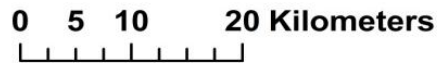

Supplement: MOESM1 [file 9489028]
